# Supplementary material for: Subtype‐Specific Interactions and Prognosis in Cardiac Amyloidosis
Source: PubMed Central journal article supplement — J Am Heart Assoc. 2016 Mar 24;5(3):e002877. doi: 10.1161/JAHA.115.002877 (PMC4943263; doi:10.1161/jaha.115.002877), 2016-03-24
Supplement: JAH3-5-e002877-s001.pdf [file JAH3-5-e002877-s001.pdf]

**SUPPLEMENTAL MATERIAL**

**Table S1: Comparison of Hereditary and Wild Type (Senile) Transthyretin Cardiac Amyloidosis**

| <b>Variable</b>                          | <b>ATTRm (n = 51)</b> | <b>ATTRwt (n = 75)</b> | <b>Untyped ATTR (n = 42)</b> | <b>p value*</b> |
|------------------------------------------|-----------------------|------------------------|------------------------------|-----------------|
| <b>Age (years)</b>                       | 71.2 ± 9.4            | 75.9 ± 8.5             | 79.0 ± 7.2                   | 0.005           |
| <b>Male</b>                              | 34 (67)               | 66 (88)                | 35 (83)                      | 0.007           |
| <b>Caucasian</b>                         | 15 (29)               | 68 (91)                | 27 (64)                      | <0.001          |
| <b>Body surface area (m<sup>2</sup>)</b> | 2.00 ± 0.25           | 2.00 ± 0.23            | 1.98 ± 0.27                  | 0.918           |
| <b>Hypertension</b>                      | 32 (63)               | 49 (65)                | 26 (62)                      | 0.851           |
| <b>Hyperlipidemia</b>                    | 25 (49)               | 47 (63)                | 26 (62)                      | 0.146           |
| <b>Diabetes mellitus</b>                 | 15 (29)               | 20 (27)                | 13 (31)                      | 0.840           |
| <b>Smoking</b>                           | 28 (56)               | 40 (53)                | 24 (58)                      | 0.856           |
| <b>Atrial fibrillation</b>               | 12 (24)               | 58 (77)                | 22 (52)                      | <0.001          |
| <b>Anemia</b>                            | 20 (39)               | 40 (53)                | 19 (45)                      | 0.147           |
| <b>CAD requiring PCI or CABG</b>         | 8 (16)                | 21 (28)                | 13 (31)                      | 0.133           |
| <b>NYHA Class ≥ 3</b>                    | 30 (60)               | 46 (61)                | 27 (64)                      | 1.000           |
| <b>eGFR (mL/min/1.73 m<sup>2</sup>)</b>  | 64.2 ± 27.6           | 59.0 ± 21.2            | 56.1 ± 21.2                  | 0.264           |
| <b>Beta-blocker</b>                      | 25 (49)               | 41 (55)                | 30 (71)                      | 0.588           |
| <b>ACEI / ARB</b>                        | 22 (43)               | 28 (37)                | 23 (55)                      | 0.580           |
| <b>Diuretic</b>                          | 40 (78)               | 63 (84)                | 35 (83)                      | 0.485           |
| <b>Amyloid specific treatment</b>        | 15 (29)               | 25 (33)                | 4 (10)                       | 0.700           |
| <b>Echocardiography</b>                  |                       |                        |                              |                 |
| <b>Ejection fraction</b>                 | 44.2 ± 14.9           | 46.6 ± 13.9            | 47.5 ± 15.9                  | 0.368           |
| <b>LVEDD</b>                             | 40.3 ± 6.0            | 42.1 ± 6.8             | 41.0 ± 7.5                   | 0.111           |
| <b>LVESD</b>                             | 30.9 ± 6.1            | 31.8 ± 7.5             | 31.1 ± 7.8                   | 0.471           |
| <b>LV mass index</b>                     | 173.4 ± 55.4          | 166.6 ± 48.5           | 167.2 ± 57.6                 | 0.480           |

|                                     |                      |                      |                     |       |
|-------------------------------------|----------------------|----------------------|---------------------|-------|
| <b>TR grade <math>\geq 3</math></b> | 11 (22)              | 13 (17)              | 4 (10)              | 0.646 |
| <b>Deceleration time</b>            | 160.5 $\pm$ 44.4     | 178.1 $\pm$ 59.0     | 178.0 $\pm$ 52.4    | 0.065 |
| <b>Average E/e'</b>                 | 20.6 $\pm$ 10.2      | 20.3 $\pm$ 9.0       | 21.3 $\pm$ 7.8      | 0.871 |
| <b>Electrocardiography</b>          |                      |                      |                     |       |
| <b>Limb voltage</b>                 | 16.9 $\pm$ 7.5       | 17.1 $\pm$ 7.3       | 16.7 $\pm$ 7.3      | 0.923 |
| <b>Sokolow voltage</b>              | 12.9 $\pm$ 6.4       | 14.0 $\pm$ 7.8       | 15.1 $\pm$ 10.0     | 0.429 |
| <b>QRS duration</b>                 | 110.6 $\pm$ 26.7     | 114.0 $\pm$ 28.8     | 114.3 $\pm$ 28.1    | 0.540 |
| <b>Biomarkers</b>                   |                      |                      |                     |       |
| <b>Troponin T <sup>†</sup></b>      | 0.048 [0.020, 0.138] | 0.063 [0.021, 0.108] | 0.08 [0.038, 0.130] | 0.937 |
| <b>NT-proBNP <sup>‡</sup></b>       | 3316 [1657, 6080]    | 3109 [1734, 7641]    | 4509 [2997, 11139]  | 0.914 |

ATTRm = hereditary or mutant transthyretin amyloidosis. ATTRwt = senile or wild type transthyretin amyloidosis. Other abbreviations as in Table 1 and 2.

\* P values represent ATTRm vs ATTRwt. <sup>†</sup> ATTRm n = 38, ATTRwt n = 44, unspecified ATTR n = 23. <sup>‡</sup> ATTRm n = 30, ATTRwt n = 45, unspecified ATTR = n = 26.
